# Supplementary material for: Organocatalysts immobilised onto gold nanoparticles: application in the asymmetric reduction of imines with trichlorosilane
Source: Royal Society of Chemistry journal article supplement (doi:10.1039/b821391g), 2009-01-01
Supplement: b821391g.pdf [file b821391g.pdf]

**Electronic Supplementary Information (ESI)**

**Organocatalysts immobilised onto gold nanoparticles: Application in the asymmetric reduction of imines with trichlorosilane**

*Andrei V. Malkov, Marek Figlus, Graeme Cooke, Stuart T. Caldwell, Gouher Rabani, Mark R. Prestly, and Pavel Kočovský*

**TEM images of 6a and 7a.**

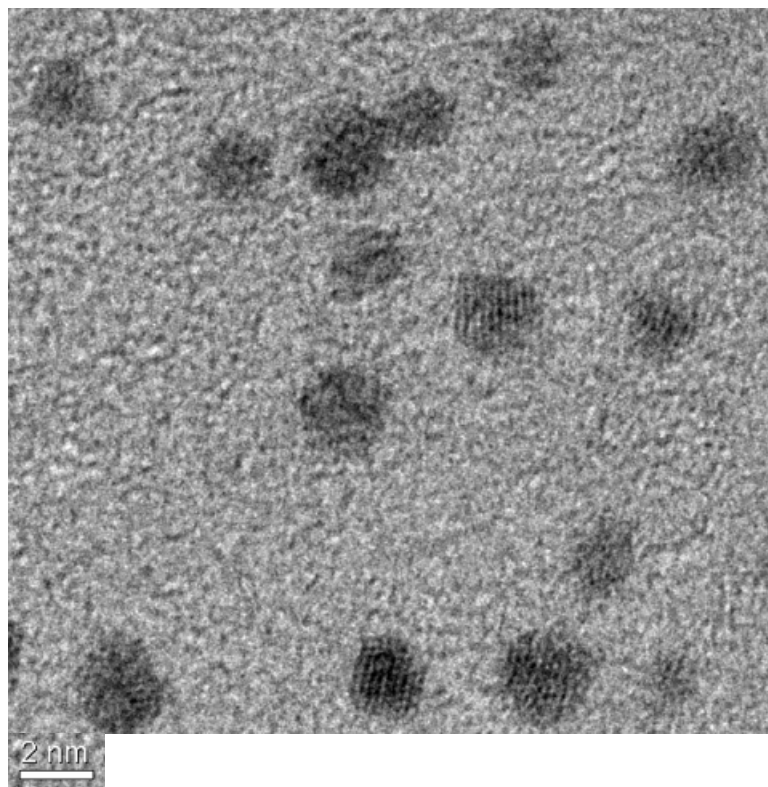

**Fig. S1.** TEM images of nanoparticles **6a**

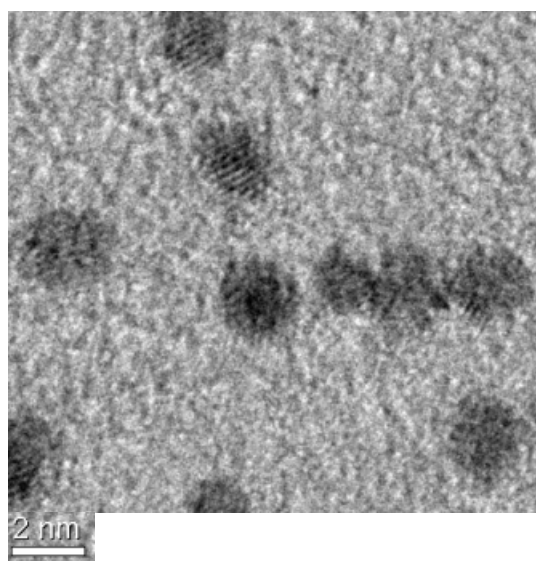

**Fig. S2.** TEM images of nanoparticles **7a**
